# Supplementary material for: An Experimental Evaluation of Toxicity Effects of Sodium Chloride on Oviposition, Hatching and Larval Development of Aedes albopictus
Source: MDPI journal article supplement (doi:10.3390/pathogens11020262), 2022-02-18
Supplement: s1 [file s1]

**Table S1. The total number of eggs laid, average number of eggs per female mosquito laid , and the ratios of female to male adults in three replicate cage.**

| Replicate | Total No. | Female : Male | Average No. | <i>F</i> | <i>P</i> |
|-----------|-----------|---------------|-------------|----------|----------|
| A         | 4551      | 115:88        | 39.6        | 3.00     | 0.333    |
| B         | 6366      | 167:44        | 38.1        |          |          |
| C         | 6485      | 170:56        | 38.1        |          |          |

We set three replicates. Total No. denotes the total number of eggs laid in screen cage. Female : male denotes the ratios of female to male adults in each cages. Average No. Denotes the average number of eggs per female mosquito laid. Ordinary one-way ANOVA showed no significant difference between three replicates.
